# Supplementary material
Source: PubMed Central journal article supplement (PMC3741497)
Supplement: cdd201338x1.pdf [file cdd201338x1.pdf]

# Supplemental Figure 1

## A

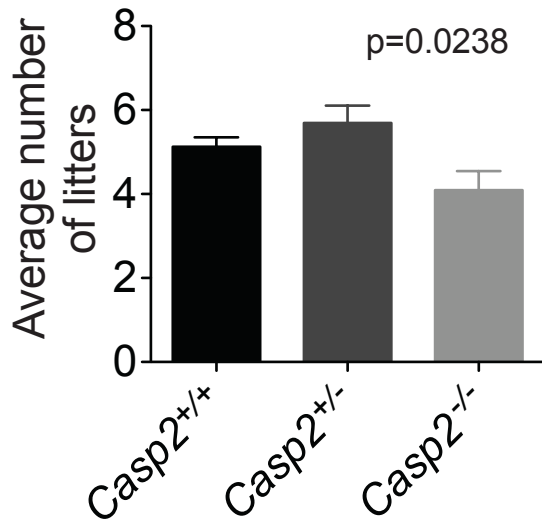

## B

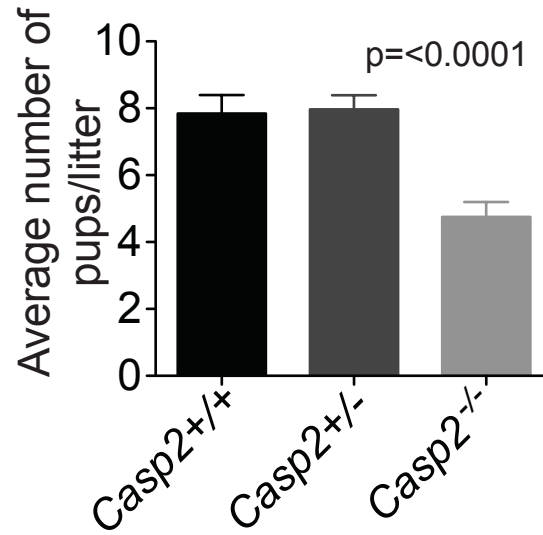

Supplemental Figure 1. *Casp2*<sup>+/+</sup>/MMTV, *Casp2*<sup>+/-</sup>/MMTV and *Casp2*<sup>-/-</sup>/MMTV multiparous mice display significant differences in the number of pregnancies prior to tumor formation. The number of litters born (A) and the average number of pups/litter (B) for each genotype are shown. Error bars represent the SEM. p values were determined by one-way ANOVA.
