# Supplementary material
Source: PubMed Central journal article supplement (PMC3741497)
Supplement: cdd201338x3.pdf [file cdd201338x3.pdf]

# Supplemental Figure 3

## A

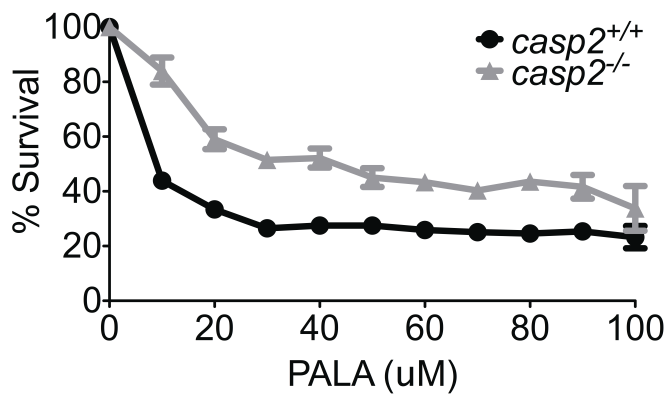

## B

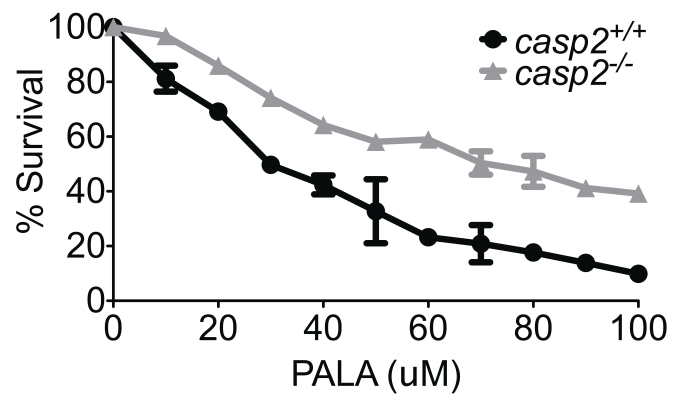

## C

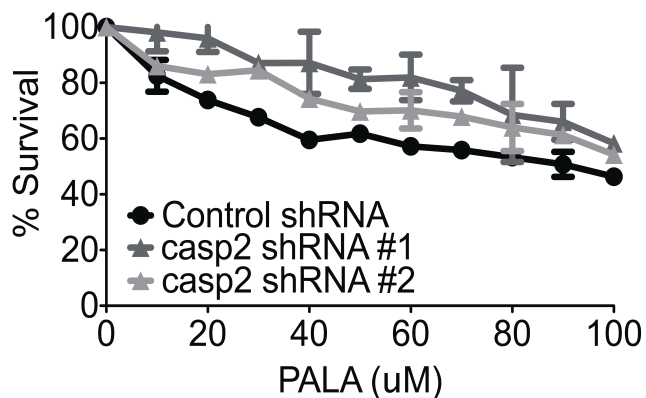

Supplemental Figure 3. Cells lacking caspase-2 expression are more resistant to PALA treatment than cells expressing caspase-2. A, E1A/Ras-transformed *Casp2*<sup>+/+</sup> MEFs and *Casp2*<sup>-/-</sup> MEFs from littermate embryos were treated with the indicated doses of PALA for three days, at which time viability was assessed by XTT assay. The percentage of surviving cells relative to untreated is shown. The average of two experiments in which at least four wells/dose/genotype were examined is shown. Error bars represent standard deviation. B, A second set of littermate matched *Casp2*<sup>+/+</sup> and *Casp2*<sup>-/-</sup> MEFs were treated with PALA as in A. C. MCF7 cells stably transfected with non-targeting (shControl) shRNA or two different shRNAs targeting *CASP2* (sh*CASP2*#1 and sh*CASP2*#2) were treated with the indicated doses of PALA for 72 hours, at which point viability was assessed by XTT assay. Error bars represent the standard deviation of triplicate determinations.
