# Supplementary material
Source: PubMed Central journal article supplement (PMC3741497)
Supplement: cdd201338x4.pdf [file cdd201338x4.pdf]

# Supplemental Figure 4

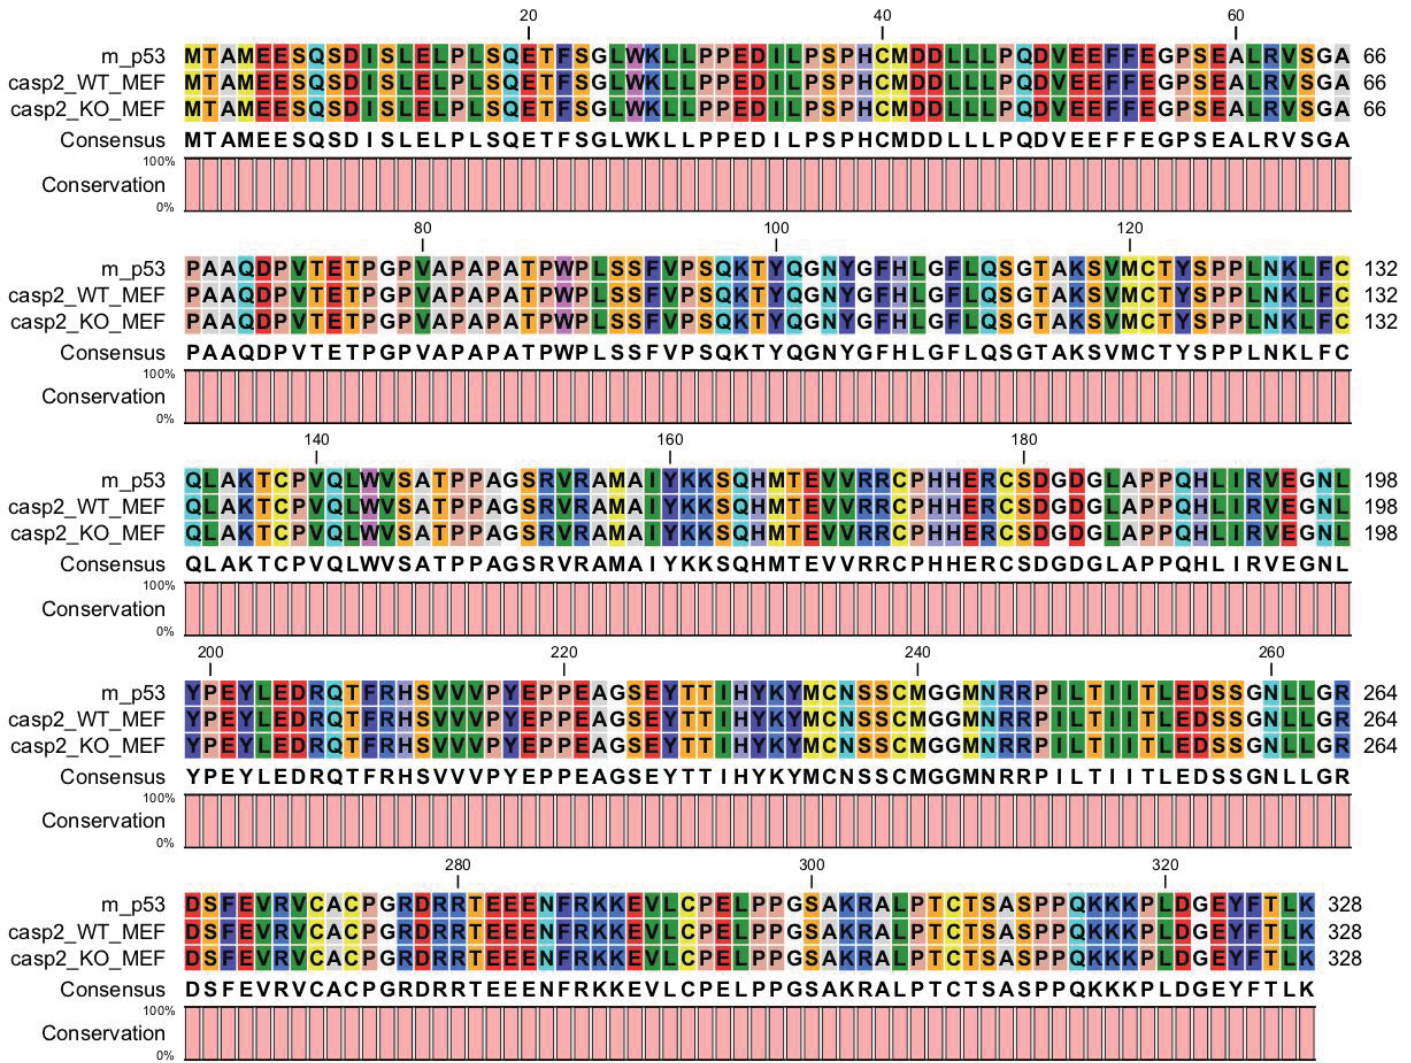

Supplemental Figure 4. *p53* is not mutated in *Casp2*<sup>+/+</sup> or *Casp2*<sup>-/-</sup> MEFs. Shown is the protein alignment of murine *p53* (RefSeq: NM\_011640) with *p53* from *Casp2*<sup>+/+</sup> and *Casp2*<sup>-/-</sup> MEFs. Each exon of *p53* was amplified from DNA isolated from *Casp2*<sup>+/+</sup> or *Casp2*<sup>-/-</sup> MEFs, TOPO cloned and sequenced as described in the Materials and Methods.
